# Supplementary material
Source: MDPI journal article supplement (https://www.mdpi.com/2075-163X/9/10/570)
Supplement: s1 [file s1]

## Supplementary

**Table S1.** Anisotropic atom displacement parameters for dmisteinbergite ( $\text{\AA}^2$ ).

| Atom | $U^{11}$   | $U^{22}$   | $U^{33}$  | $U^{23}$   | $U^{13}$  | $U^{12}$   |
|------|------------|------------|-----------|------------|-----------|------------|
| Ca1  | 0.0103 (6) | $= U^{11}$ | 0.009 (1) | 0          | 0         | 0.0051 (3) |
| Ca2  | 0.0162 (7) | $= U^{11}$ | 0.014 (1) | 0          | 0         | 0.0081 (3) |
| T1   | 0.0053 (9) | $= U^{11}$ | 0.007 (1) | 0          | 0         | 0.0027 (5) |
| T2   | 0.010 (1)  | $= U^{11}$ | 0.014 (2) | 0          | 0         | 0.0050 (7) |
| T3   | 0.014 (1)  | $= U^{11}$ | 0.017 (2) | 0          | 0         | 0.0071 (6) |
| T4   | 0.007 (1)  | $= U^{11}$ | 0.006 (1) | 0          | 0         | 0.0035 (5) |
| O1   | 0.019 (4)  | $= U^{11}$ | 0.001 (4) | 0          | 0         | 0.009 (2)  |
| O2   | 0.015 (4)  | $= U^{11}$ | 0.034 (7) | 0          | 0         | 0.007 (2)  |
| O3   | 0.005 (1)  | 0.007 (2)  | 0.006 (1) | 0.004 (1)  | 0.002 (2) | 0.003 (2)  |
| O4   | 0.021 (4)  | 0.013 (4)  | 0.019 (3) | -0.005 (3) | 0.004 (3) | 0.010 (3)  |
